# Supplementary material
Source: PubMed Central journal article supplement (PMC3635471)
Supplement: NIHMS457120-supplement-05.pdf [file NIHMS457120-supplement-05.pdf]

## SUPPLEMENTAL DIGITAL CONTENT LEGENDS

**Supplemental Digital Content 1: Supplemental methods.** Complete study methodology.

**Supplemental Digital Content 2: Table S1. Summary of abstracted characteristics of reviewed studies on *AGTR1* +1166A>C polymorphism and preeclampsia.** Summary of abstracted characteristics from studies included in the systematic review and meta-analysis.

**Supplemental Digital Content 3: Table S2. Genotype distributions of reviewed studies on *AGTR1* polymorphisms and preeclampsia.** Summary of genotype information from studies included in the systematic review and meta-analysis.

**Supplemental Digital Content 4: Figure S1. Funnel plot of *AGTR1* +1166 C versus A alleles for all reviewed studies.** Standard error of the logarithm of the odds ratio (SE(log[OR])) was plotted against the OR of each study.
