# Supplementary material
Source: PubMed Central journal article supplement (PMC3635471)

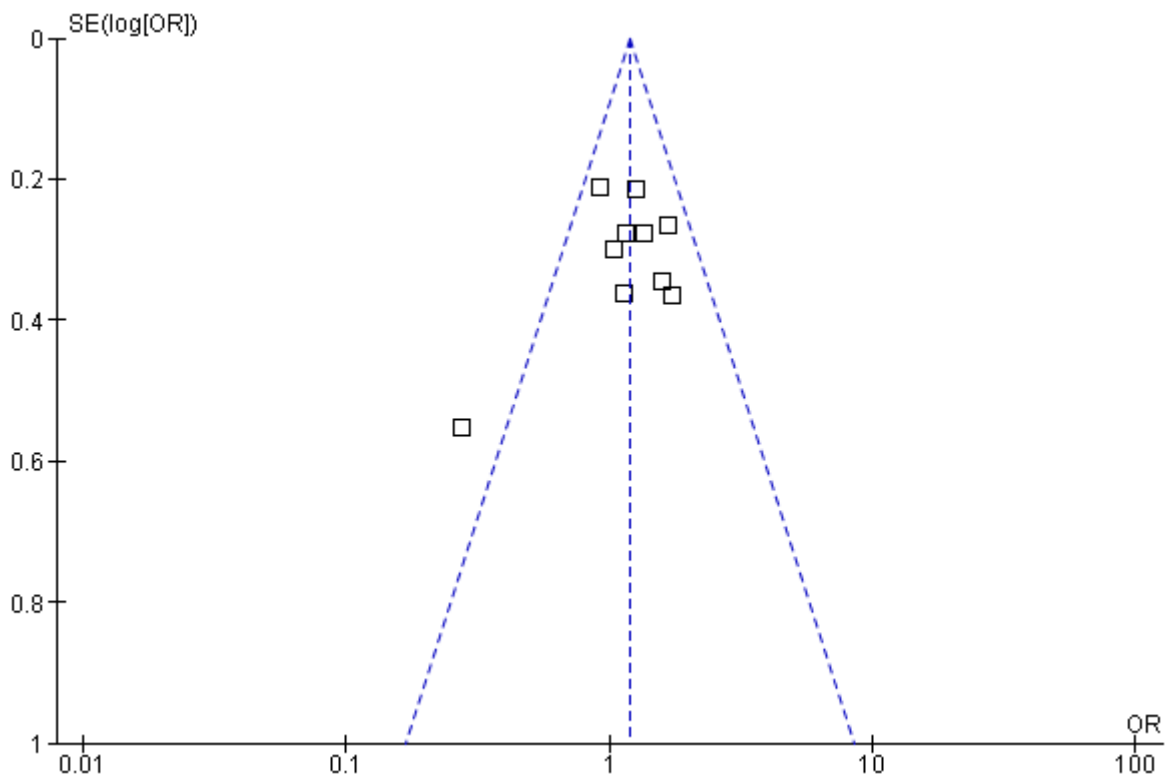

Supplement: NIHMS457120-supplement-Arrays_4.pdf [file NIHMS457120-supplement-Arrays_4.pdf]
